# Supplementary material for: Prevalence of Common Mental Disorder and Its Association with Khat Chewing among Ethiopian College Students: A Systematic Review and Meta-Analysis
Source: Psychiatry J. 2020 Jan 3;2020:1462141. doi: 10.1155/2020/1462141 (PMC6969648; doi:10.1155/2020/1462141)
Supplement: Supplementary 2 — Two by two table showing a data extraction format to calculate the association between common mental disorder and khat chewing. [file 1462141.f2.xlsx]

## Sheet: Khat chewing
Author	supplementary file- 2: Two by two table showing data extraction format to calculate association between common mental disorder and Khat chewing	A	B	C	D
Yadeta D et al	2013	59	126	34	211
Dachew et al	2015	81	69	261	425
kerebih H et al	2017	18	8	84	180
Haile et al	2017	17	13	228	130
Tesfahunegn & Gebremariam	2019	57	60	307	495
Tariku G.H et al	2017	19	21	71	197
